# Supplementary material for: Prevalence of Yersinia enterocolitica Bioserotype 3/O:3 among Children with Diarrhea, China, 2010–2015
Source: PubMed Central journal article supplement (PMC5572862; doi:10.3201/eid2309.160827), 2017-09
Supplement: 16-0827-Techapp-s1.pdf [file 16-0827-Techapp-s1.pdf]

# Prevalence of *Yersinia enterocolitica* Bioserotype 3/O:3 among Children with Diarrhea, China, 2010–2015

## Technical Appendix

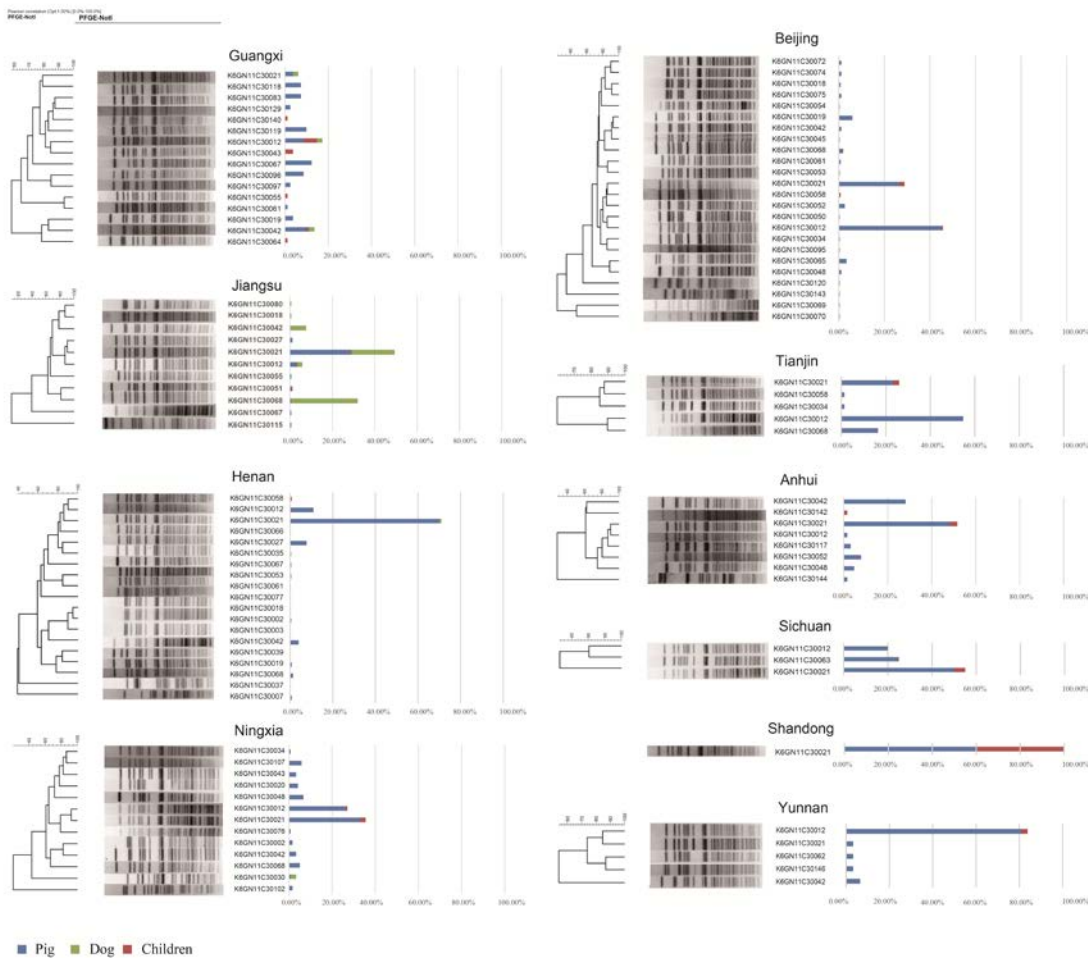

**Technical Appendix Figure 1.** Cluster analysis of pulsed-field gel electrophoresis patterns of 3/O:3 *Yersinia enterocolitica* isolates obtained from children  $\leq 5$  years of age, pigs, and dogs by region, China,

2010–2015. Gels depict DNA digests with *NotI*. Clustering trees indicate relatedness of strains. The proportion of each pattern detected per region for children, dogs, and pigs are indicated.

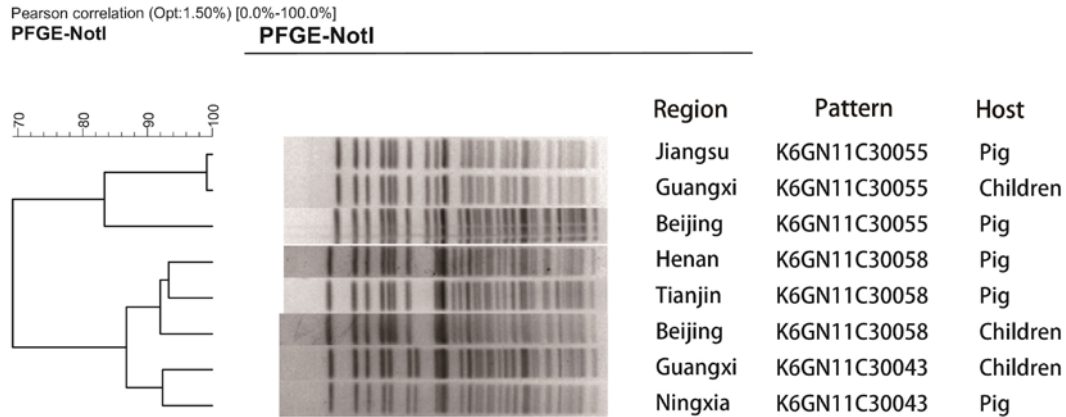

**Technical Appendix Figure 2.** Cluster analysis of pulsed-field gel electrophoresis patterns show that 3/O:3 *Yersinia enterocolitica* isolates from 6 children  $\leq 5$  years of age from Guangxi and Beijing share patterns indistinguishable from isolates found in pigs from other regions. Gels depict DNA digests with *NotI*, and clustering trees indicate the relatedness of the isolates shown.
